# Supplementary material for: Regional-scale groundwater analysis with dimensionality reduction
Source: Copernicus journal article supplement (doi:10.5194/egusphere-2024-4031), 2025-01-30
Supplement: Supplementary file 1 [file egusphere-2024-4031-supplement.pdf]

# Supplements

## Time-lag analysis

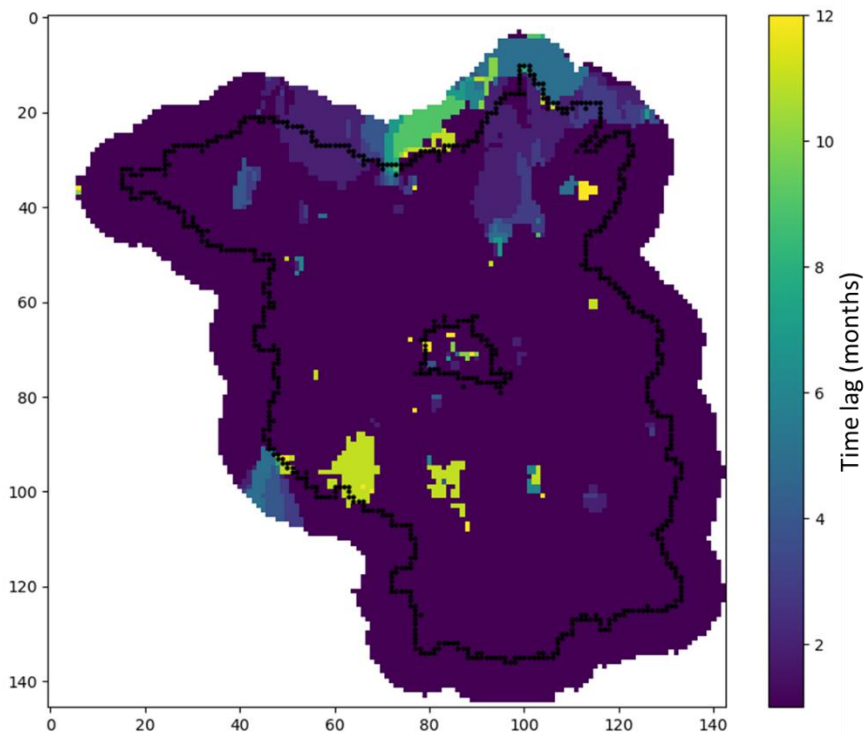

**Supplementary figure S1.**

Supplementary figure S1 was created by trying out different time lags between the climate forcing and the groundwater level change timeseries, pixel-by-pixel. The selection of the best fit was done via evaluating the  $r^2$  score of the water availability and groundwater change timeseries. The lag with the highest  $r^2$  score is selected. The map shows that almost everywhere in Brandenburg the optimal time lag is 1 month.

Note that all the wells used in this study are screened in the top aquifer.

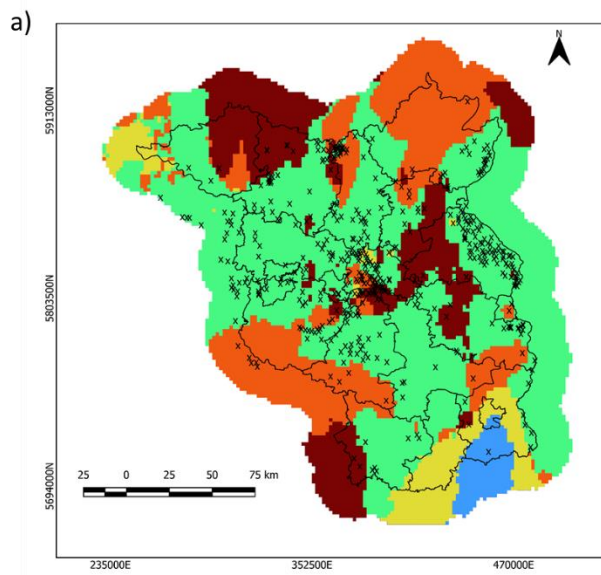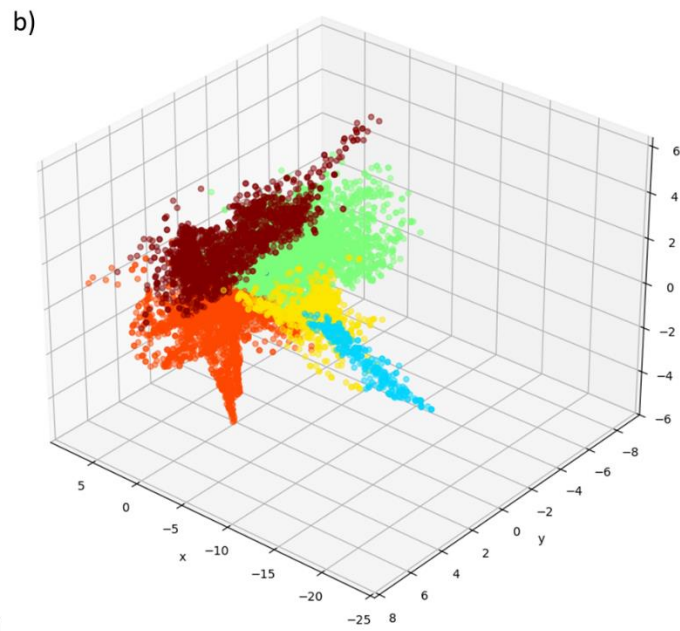

**Supplementary figure S2. Clustering the point cloud: a) spatial distribution of the identified clusters on a map, b) distribution of the clusters within the point cloud (in feature space).**

Supplementary figure S2 shows the clustering results, both mapped out spatially (S2a) and over the 3-D point cloud (S2b).
